# Supplementary material for: nr3c1 null mutant zebrafish are viable and reveal DNA-binding-independent activities of the glucocorticoid receptor
Source: PubMed Central journal article supplement (PMC5491532; doi:10.1038/s41598-017-04535-6), 2017-06-29
Supplement: 41598_2017_4535_MOESM1_ESM.pdf [file 41598_2017_4535_MOESM1_ESM.pdf]

# *nr3c1* null mutant zebrafish are viable and reveal DNA-binding-independent activities of the glucocorticoid receptor

<sup>1</sup>Facchinello N, <sup>1</sup>Skobo T, <sup>2</sup>Meneghetti G, <sup>1</sup>Colletti E, <sup>1</sup>Dinarelli A, <sup>1</sup>Tiso N, <sup>2</sup>Costa R, <sup>3</sup>Gioacchini G., <sup>3</sup>Carnevali O, <sup>1</sup>Argenton F, <sup>1</sup>Colombo L, <sup>1</sup>Dalla Valle L.

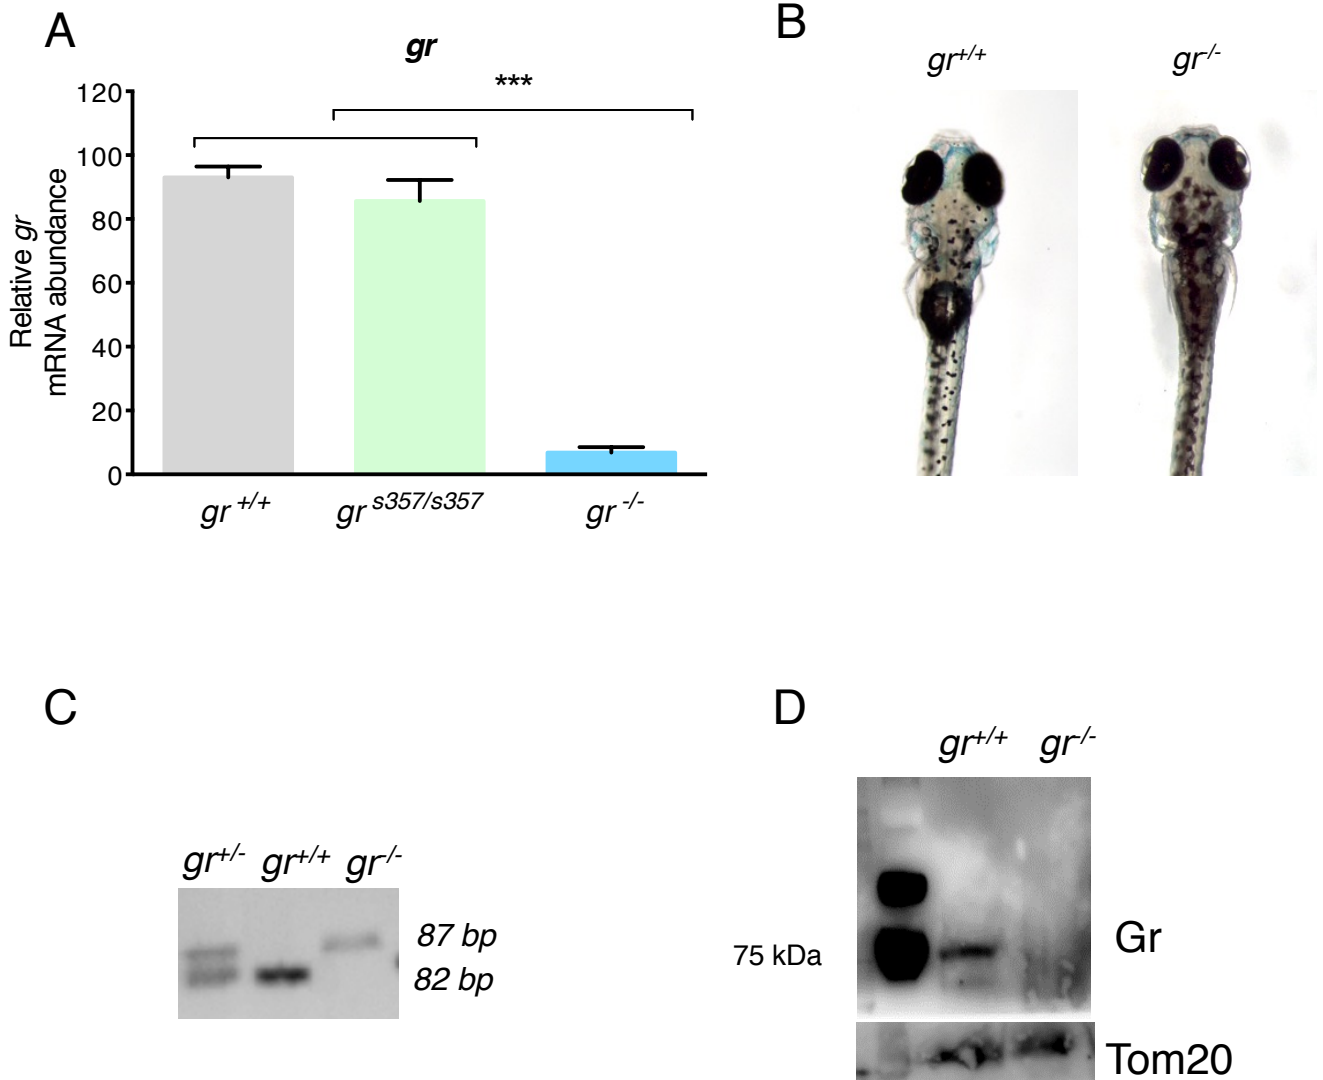

Supplemental Fig. 1. (A): qRT-PCR of *gr* mRNA in 5-dpf mutant larvae compared to control shows a statistically significant reduction of *gr* expression. Values represent the mean  $\pm$  SEM. Asterisks indicate that expression levels are significantly different from the control: \*\*\* $P < 0.001$ . Data were generated from four biological replicates.

(B): Representative images of 5-dpf control *gr*<sup>+/+</sup> and mutant *gr*<sup>-/-</sup> larvae after exposure to VBA stimulus. *gr*<sup>-/-</sup> mutants appear darker in comparison to control. (C): Representative gel image of PCR genotyping using genomic DNA from tail fins of adults born from a cross between *gr* heterozygotes. (D): Western blot of liver proteins from 8-month-old *gr*<sup>-/-</sup> and *gr*<sup>+/+</sup> zebrafish showing disappearance of the protein band with respect to control.

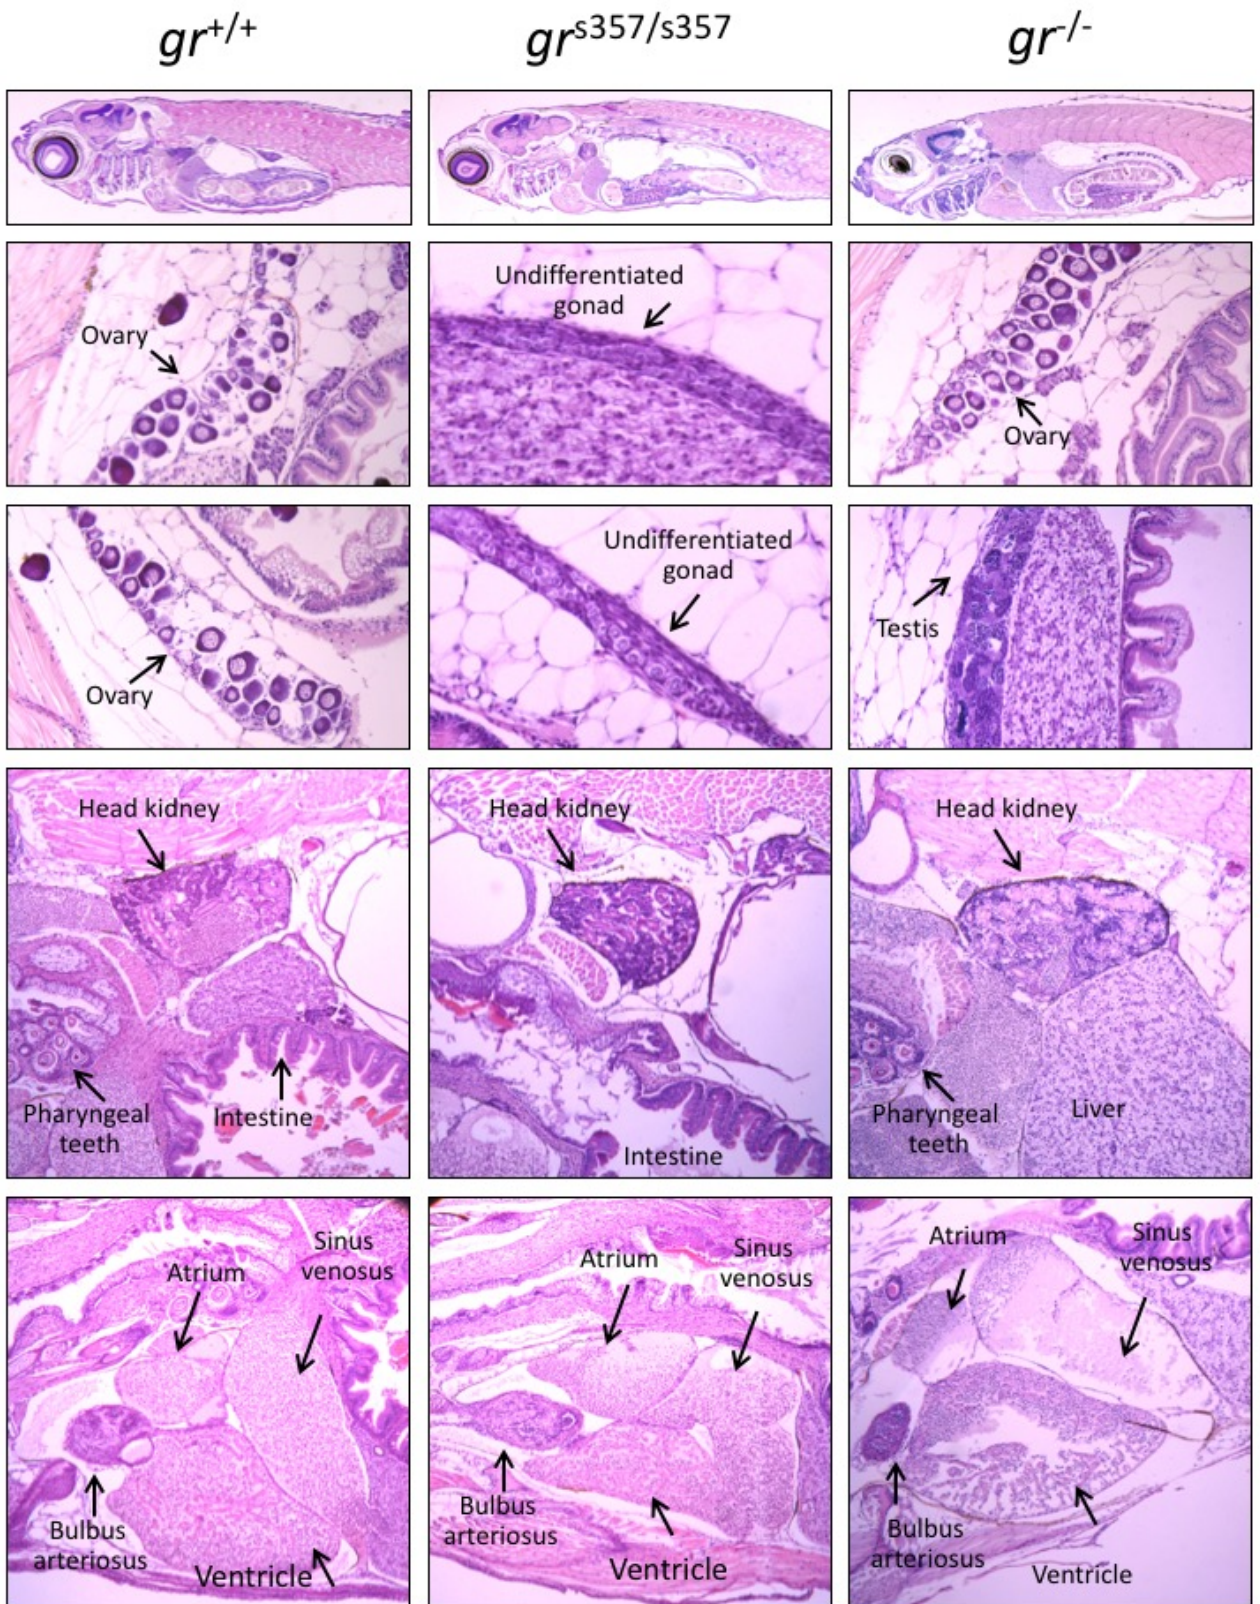

Supplemental Fig. 2a. Histological analysis of two samples of each genotype, *gr*<sup>+/+</sup>, *gr*<sup>s357/s357</sup> and *gr*<sup>-/-</sup> zebrafish, at 45 dpf of age. All histological images were taken from longitudinal sections stained with haematoxylin and eosin (H&E). Panels compare tissues and structures in the three different genotypes. Top 3 panels present a total body section of one sample of each genotype. Middle 9 panels present details of the gonads, head kidneys and pharyngeal teeth. Bottom 3 panels show a longitudinal section of the heart showing the reduced trabecular network of the *gr*<sup>-/-</sup> heart ventricle.



*gr*<sup>+/+</sup>

*gr*<sup>s357/s357</sup>

*gr*<sup>-/-</sup>

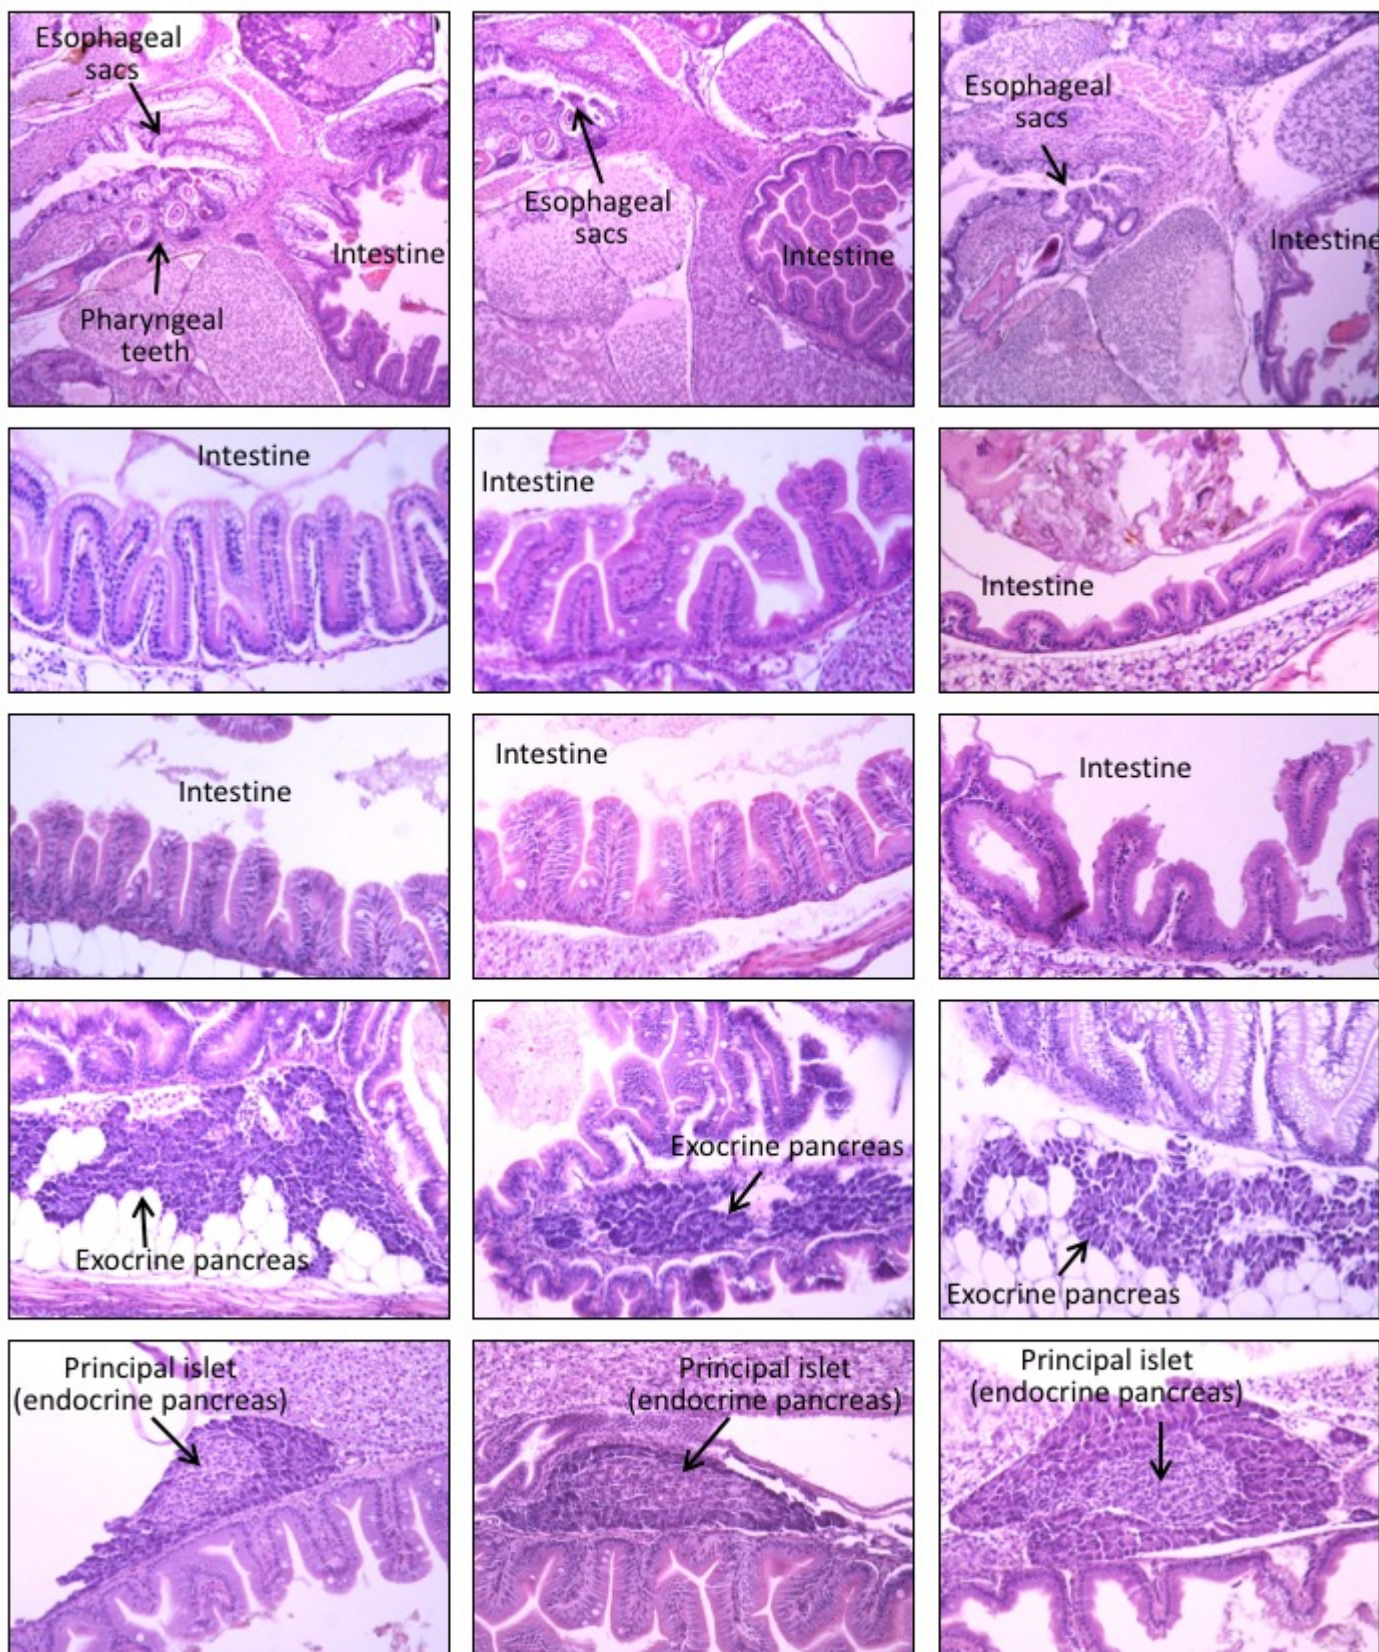

Supplemental Fig. 2b. Histological analysis of two samples of each genotype, *gr*<sup>+/+</sup>, *gr*<sup>s357/s357</sup> and *gr*<sup>-/-</sup> zebrafish, at 45 dpf of age. All histological images were taken from longitudinal sections stained with haematoxylin and eosin (H&E). Top 3 panels present sections of esophageal sacs and proximal intestine. Middle 6 panels present details of the intestine showing the presence of a thinner epithelium in *gr*<sup>-/-</sup> samples. Bottom 6 panels show details of the endocrine and exocrine pancreas.



*gr*<sup>+/+</sup>

*gr*<sup>s357/s357</sup>

*gr*<sup>-/-</sup>

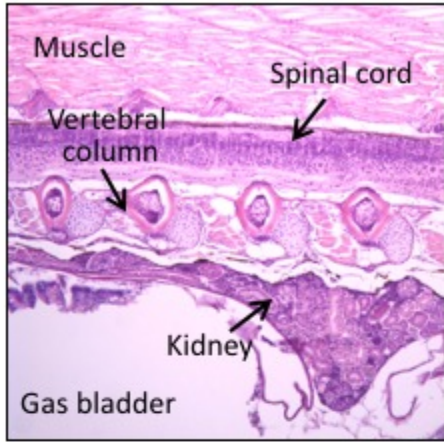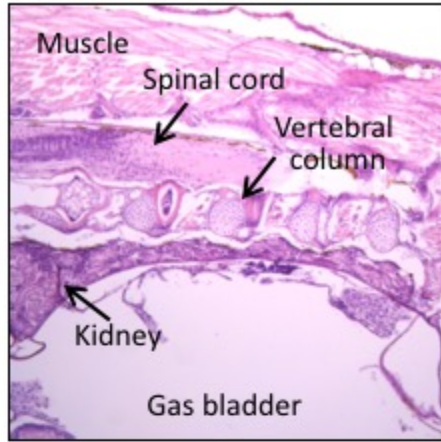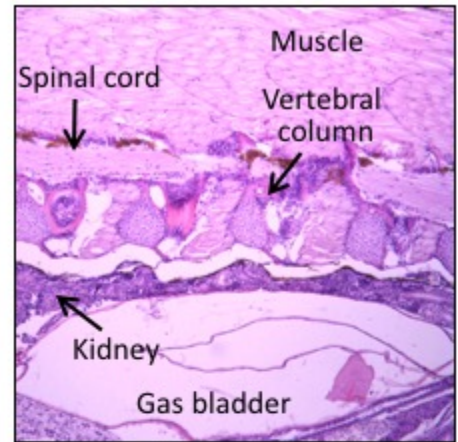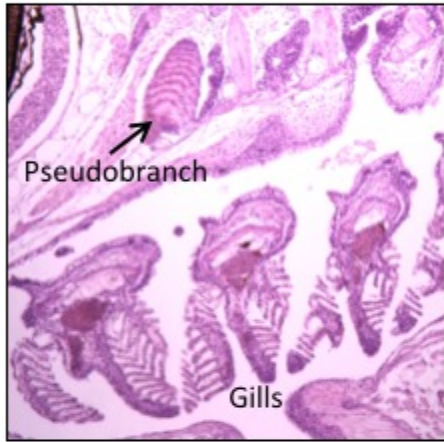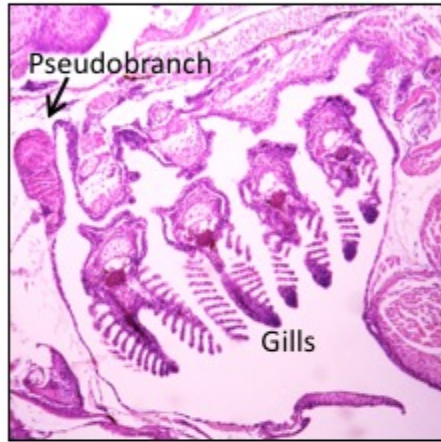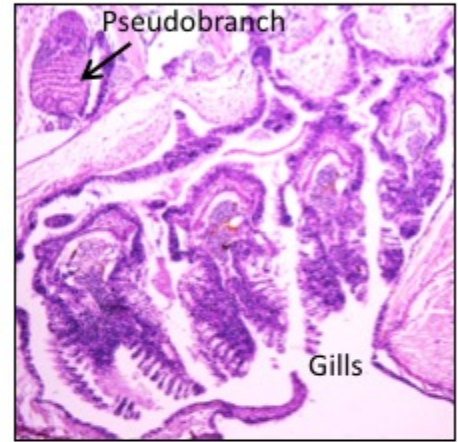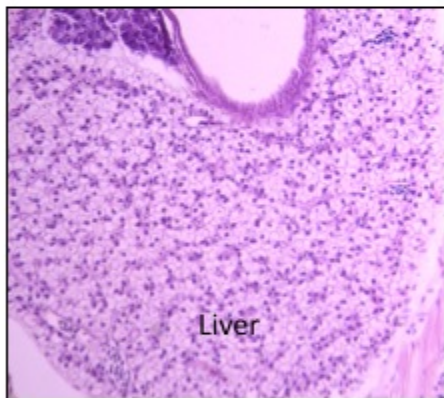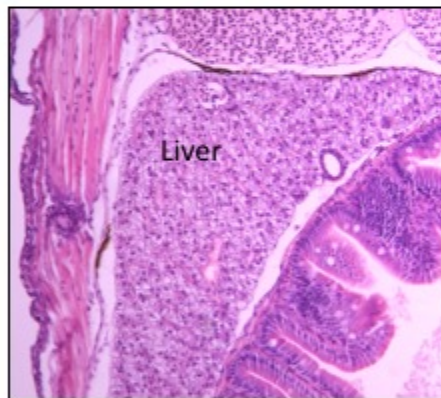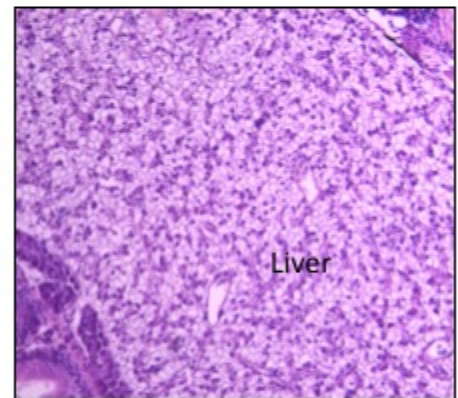

Supplemental Fig. 2c. Histological analysis of two samples of each genotype, *gr*<sup>+/+</sup>, *gr*<sup>s357/s357</sup> and *gr*<sup>-/-</sup> zebrafish, at 45 dpf of age. All histological images were taken from longitudinal sections stained with haematoxylin and eosin (H&E). Top 3 panels present sections of spinal cord and vertebral column together with the kidney. Middle 3 panels present details of pseudobranch and gills. Bottom 3 panels show sections of the liver.



*gr*<sup>-/-</sup>

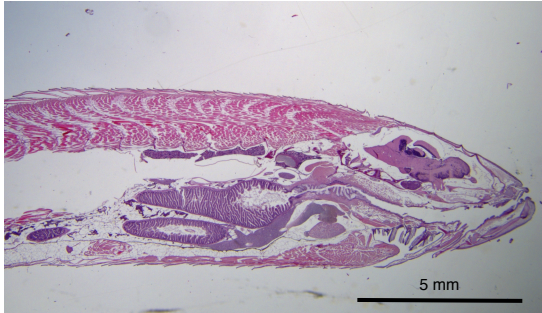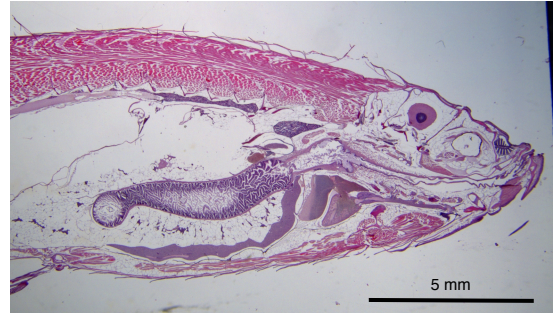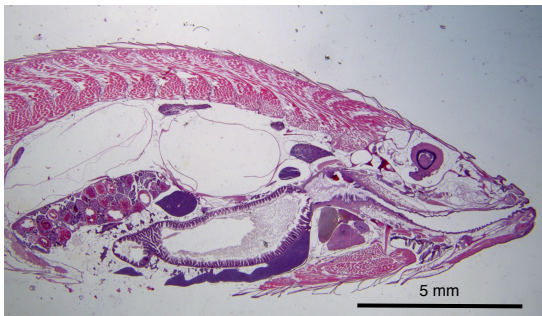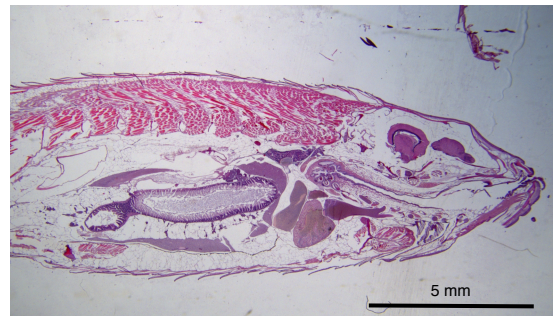

*gr*<sup>+/+</sup>

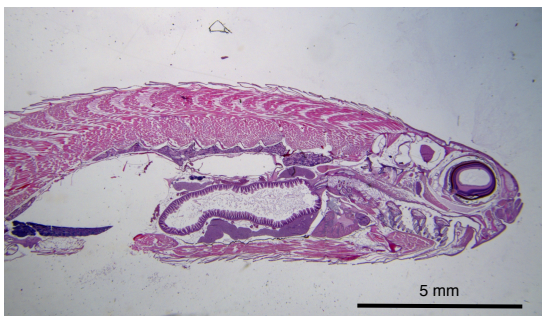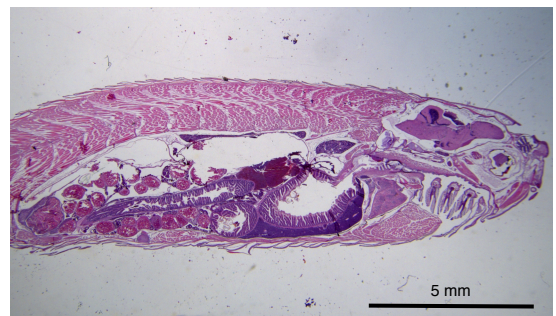

Supplemental Fig. 3. Longitudinal sections stained with haematoxylin and eosin (H&E) of four *gr*<sup>-/-</sup> and two *gr*<sup>+/+</sup> to better visualize the adipose tissue increase in mutants.



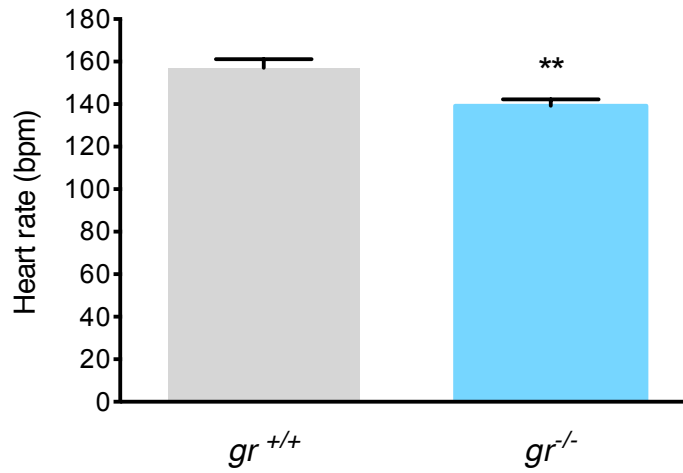

Supplemental Fig. 4. Decrease of heart rate in 5-dpf *gr*<sup>-/-</sup> with respect to *gr*<sup>+/+</sup>. n = 12. Asterisks indicate that the heart rate is significantly different from the control (one-way-ANOVA, \*\*P < 0.01).



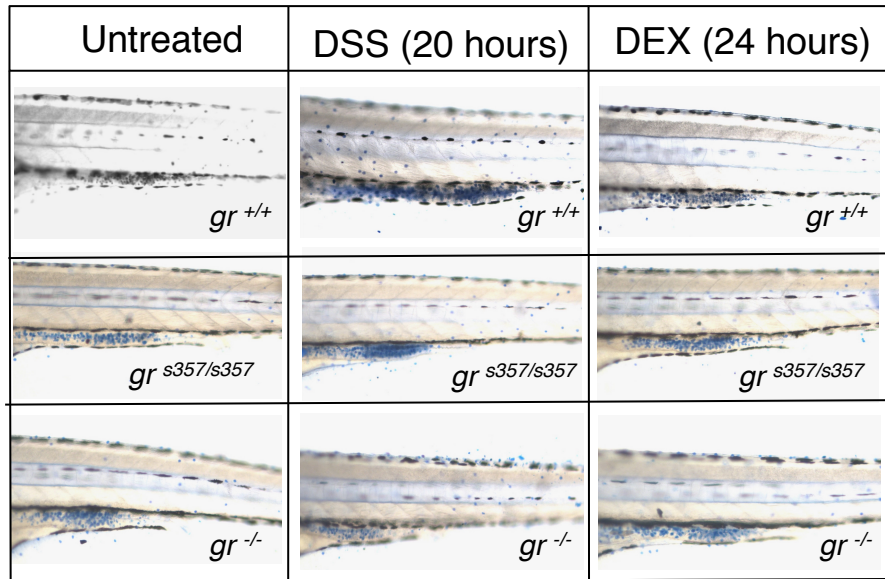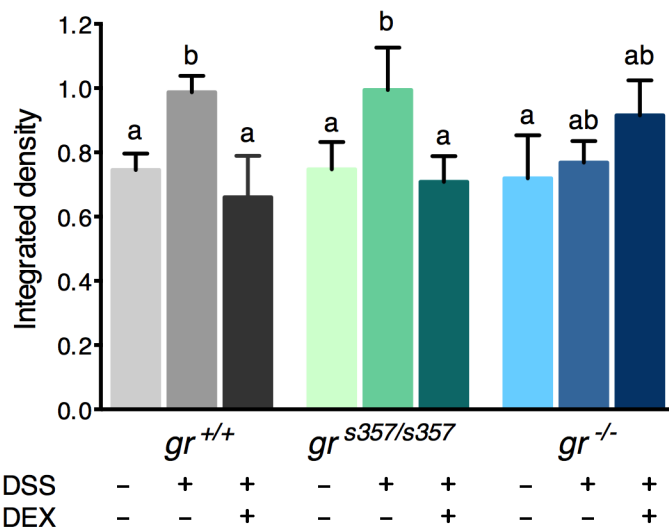

Supplemental Fig. 5. (A): Whole-mounts of the posterior intestinal region of control, DSS-exposed and DSS plus DEX-exposed larvae of the three genotypes analysed after staining with alcian blue. (B): Comparison of alcian blue-stained mucous granules in the intestine of the above larvae.  $n = 15$  larvae for each group. Values represent the mean  $\pm$  SEM. Different letters indicate statistically significant differences checked by two-way ANOVA followed by Fisher's post hoc test ( $p < 0.05$ ).
