# Supplementary material for: nr3c1 null mutant zebrafish are viable and reveal DNA-binding-independent activities of the glucocorticoid receptor
Source: PubMed Central journal article supplement (PMC5491532; doi:10.1038/s41598-017-04535-6), 2017-06-29
Supplement: 41598_2017_4535_MOESM2_ESM.pdf [file 41598_2017_4535_MOESM2_ESM.pdf]

## Supplementary Table 1

### CRISPR target site oligonucleotides (Gagnon et al., 2014)

| Oligo name        | Sequence                                                                             |
|-------------------|--------------------------------------------------------------------------------------|
| Constant oligo    | AAAAGCACCGACTCGGTGCCACTTTTTCAAGTTGATAACGGAC<br>TAGCCTTATTTTAACTTGCTATTTCTAGCTCTAAAAC |
| Gr specific oligo | ATTTAGGTGACACTATAG <b><i>GCGACCGACGACAGCTGTG</i></b> TTTT<br>AGAGCTAGAAATAGCAAG      |

\*Bold and italic sequence correspond to gRNA

### PCR primers used in mutation screens for *gr*

| Gene                                | Accession    |    | Primer (5'–3')        |
|-------------------------------------|--------------|----|-----------------------|
| <i>gr</i> <sup>-/-</sup>            | NM_001020711 | F1 | GCTCTCCTTTCAGAGCTGCC  |
|                                     |              | R1 | CTCTGCTGCATTCCACTGAC  |
|                                     |              | F2 | ACCACTTCAAGCGGACAGAG  |
|                                     |              | R2 | CCGGCTTCTGATCTTTCTGC  |
| <i>gr</i> <sup>s35/s3577/s357</sup> | NM_001020711 | F1 | GTCTCTTGACACATCCTG    |
|                                     |              | R1 | CTGACATTTAAGGACACACTG |

## PCR primers used in for qRT-PCR

| Gene                             | Accession    |   | Primer (5'-3')            |
|----------------------------------|--------------|---|---------------------------|
| <i>rplp0 (arp)</i>               | NM_131580    | F | CTGAACATCTCGCCCTTCTC      |
|                                  |              | R | TAGCCGATCTGCAGACACAC      |
| <i>rpl13a</i>                    | NM_212784    | F | TCTGGAGGACTGTAAGAGGTATGC  |
|                                  |              | R | AGACGCACAATCTTGAGAGCAG    |
| <i>gr</i>                        | NM_001020711 | F | GACAGCACTATAACCAGACAC     |
|                                  |              | R | CTTCAACATCTGTTCACAC       |
| <i>star</i>                      | NM_131663    | F | TGTAAGGGCTGAGAATGG        |
|                                  |              | R | TCAGCAAGCAATGGCTGC        |
| <i>11<math>\beta</math>-hsd2</i> | NM_212720    | F | GTCCTCTGTGTGTGCTGC        |
|                                  |              | R | GCTTGCTGTACCTGCTGAG       |
| <i>crh</i>                       | NM_001007379 | F | GAATGTAGAGCCATCGAGAGC     |
|                                  |              | R | CCCTCCAACAGACGCTGC        |
| <i>pomca</i>                     | NM_181438    | F | TGTCGAGACCTCAGCACAG       |
|                                  |              | R | TGCGAGGAGGTCGATTTGC       |
| <i>fkbp5</i>                     | NM_213149    | F | GTGTTTCGTCCACTACACC       |
|                                  |              | R | TCTCCTCACGATCCCACC        |
| <i>Il1<math>\beta</math></i>     | NM_212844    | F | GACATGCTCATGGCGAACG       |
|                                  |              | R | GCAAATCGTGCATTGCAAGACG    |
| <i>Il6</i>                       | NM_001261449 | F | GTGAAGACACTCAGAGACG       |
|                                  |              | R | GTTAGACATCTTTCCGTGCTG     |
| <i>Il8</i>                       | XM_009306855 | F | TGTTTTCTGGCATTCTGACC      |
|                                  |              | R | TTTACAGTGTGGGCTTGGAGGGG   |
| <i>mmp-9</i>                     | NM_213123    | F | CATTAAAGATGCCCTGATGTATCCC |
|                                  |              | R | AGTGGTGGTCCGTGGTTGAG      |
| <i>mmp-13</i>                    | NM_001290479 | F | ATGGTGCAAGGCTATCCCAAGAGT  |
|                                  |              | R | GCCTGTTGTTGGAGCCAAACTCAA  |
